# Supplementary material for: Sustained micellar delivery via inducible transitions in nanostructure morphology
Source: PubMed Central journal article supplement (PMC5809489; doi:10.1038/s41467-018-03001-9), 2018-02-12
Supplement: 41467_2018_3001_MOESM3_ESM.pdf [file 41467_2018_3001_MOESM3_ESM.pdf]

## **Description of Additional Supplementary Files**

**File Name: Supplementary Movie 1**

**Description:** Three-dimensional cryoTEM tomography of micelle release from PEG-bI-PPS filomicelles.
